# Supplementary material for: Coordination of Zn2+ and Cu2+ to the membrane disrupting fragment of amylin
Source: Royal Society of Chemistry journal article supplement (doi:10.1039/c6dt00628k), 2016-01-01
Supplement: c6dt00628k1.pdf [file c6dt00628k1.pdf]

Journal Name

ARTICLE

Supplementary material

## Coordination of $Zn^{2+}$ and $Cu^{2+}$ to the membrane disrupting fragment of amylin

M. Rowinska-Zyrek<sup>a</sup>

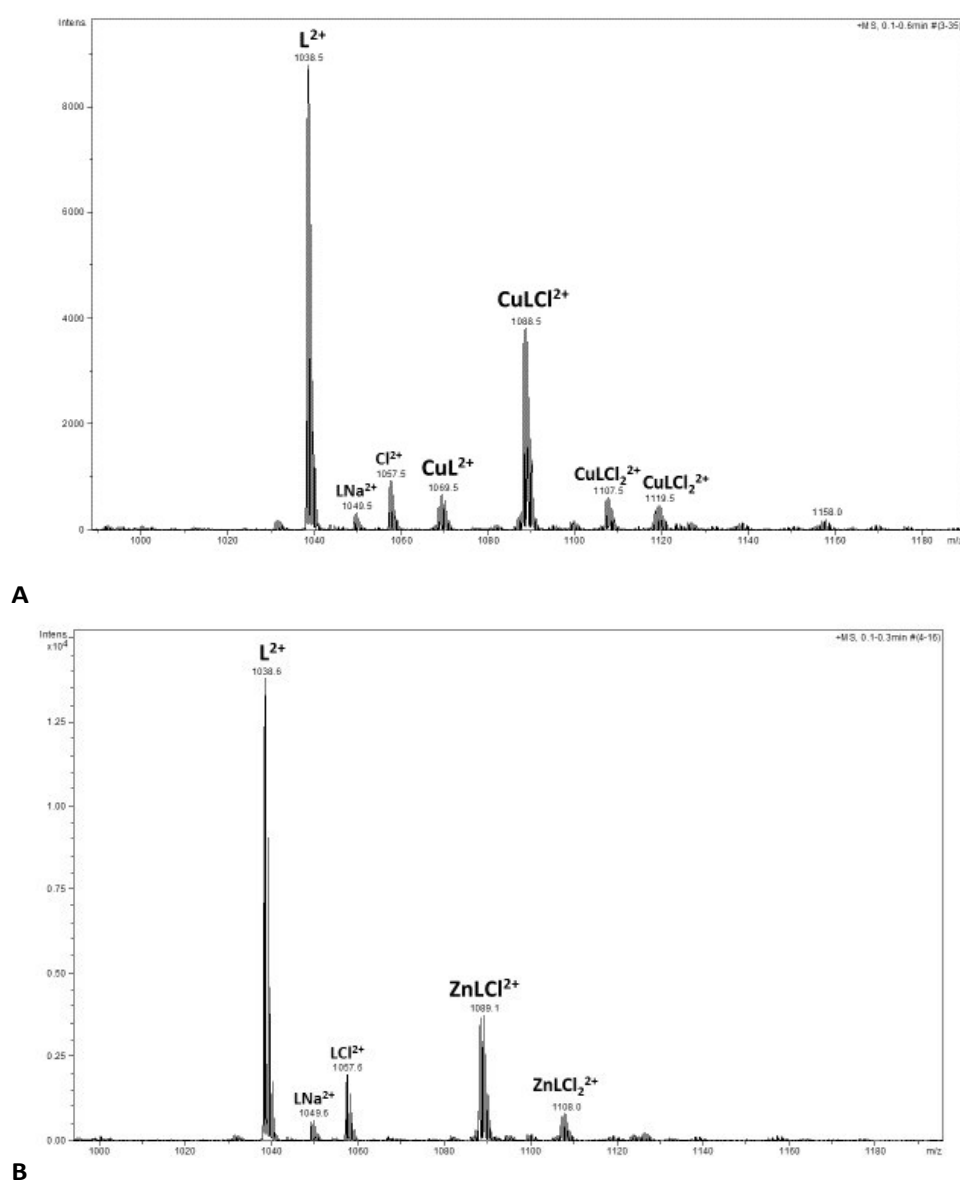

Figure S1. ESI-MS spectrum of A)  $Cu^{2+}$ -amylin<sub>1-18</sub> and B)  $Zn^{2+}$ -amylin<sub>1-19</sub> at pH 7.4. M/L molar ratio = 1:1

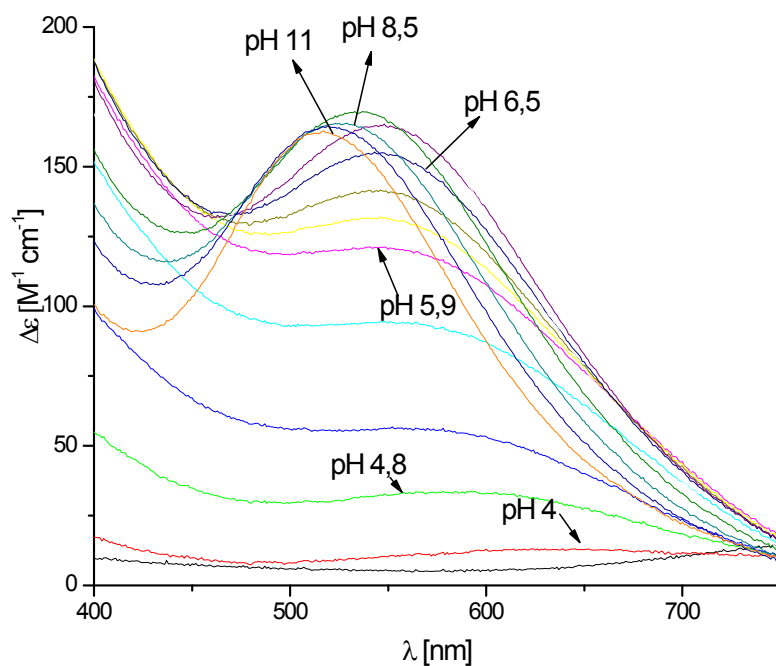

Figure S2. UV-Vis spectra of Cu<sup>2+</sup>-amylin<sub>1-19</sub> complexes recorded at different pH values. [Cu<sup>2+</sup>]=0.001 M; M/L molar ratio = 1:1.

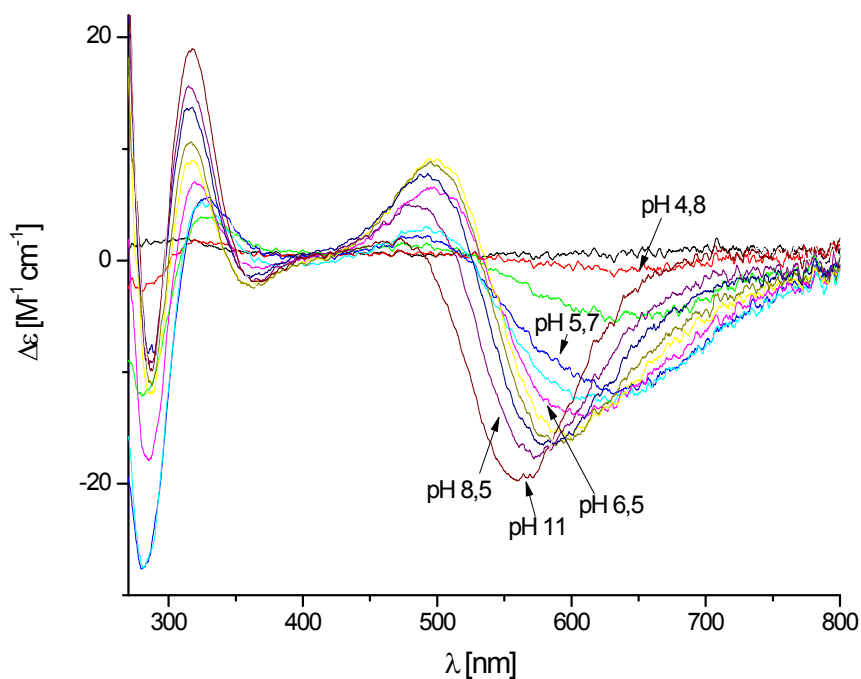

Figure S3. CD spectra of Cu<sup>2+</sup>-amylin<sub>1-19</sub> complexes recorded at different pH values. [Cu<sup>2+</sup>]=0.001 M; M/L molar ratio = 1:1.
